# Supplementary material
Source: PubMed Central journal article supplement (PMC3651878)
Supplement: NIHMS367246-supplement-1_si_001.pdf [file NIHMS367246-supplement-1_si_001.pdf]

Supporting information for “Catalytic Mechanism of 4-Oxalocrotonate  
Tautomerase: Significances of Protein-Protein Interactions on Proton  
Transfer Pathways”

*Pan Wu<sup>1</sup>, G. Andrés Cisneros<sup>2</sup>, Hao Hu<sup>3</sup>, Robin Chaudret<sup>1</sup>, Xiangqian Hu<sup>1\*</sup>, Weitao Yang<sup>1\*</sup>*

*<sup>1</sup>Department of Chemistry, Duke University, Durham, NC 27708*

*<sup>2</sup>Department of Chemistry, Wayne State University, Detroit, MI 48202*

*<sup>3</sup>Department of Chemistry, The University of Hong Kong, China*

AUTHOR EMAIL ADDRESS: [xqhu@duke.edu](mailto:xqhu@duke.edu) and [weitao.yang@duke.edu](mailto:weitao.yang@duke.edu)

## I. Supporting figures

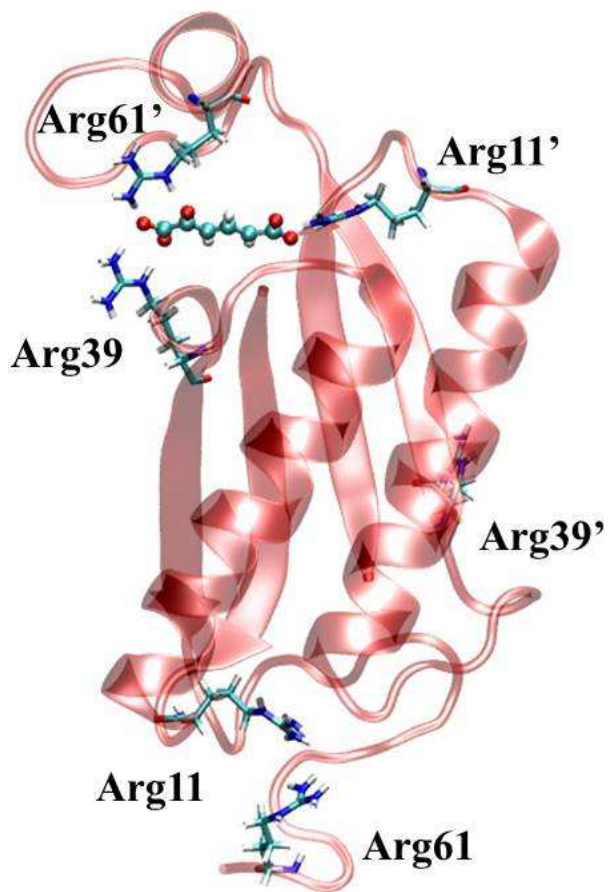

**Figure S1:** One typical snapshot of 1D1S from the classical MM MD simulation using the intermediate substrate. Large structural fluctuations for Arg39 and the active site were observed.

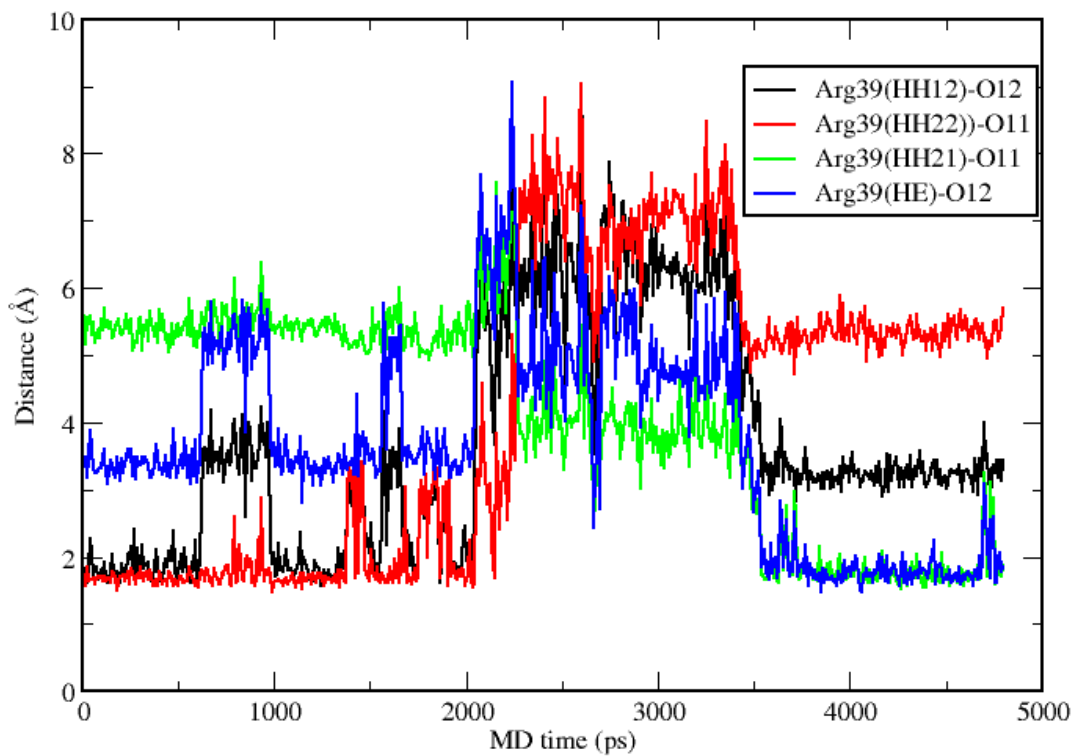

**Figure S2:** Four distances between four hydrogen atoms (HH12, HH22, HH21, HE) of Arg39 and the 1-carboxyl group of deprotonated 2HM during MD simulations.

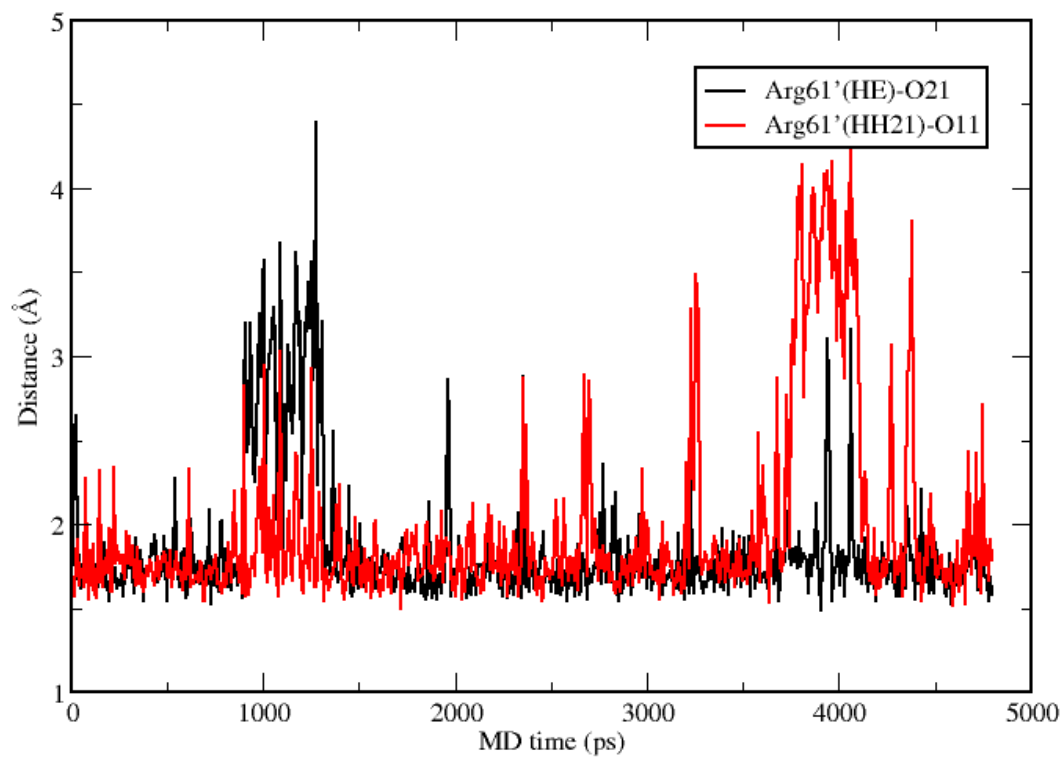

**Figure S3:** Two distances between two hydrogen atoms (HH21 and HE) of Arg61' and the 1-carbonyl group of deprotonated 2HM during MD simulations.

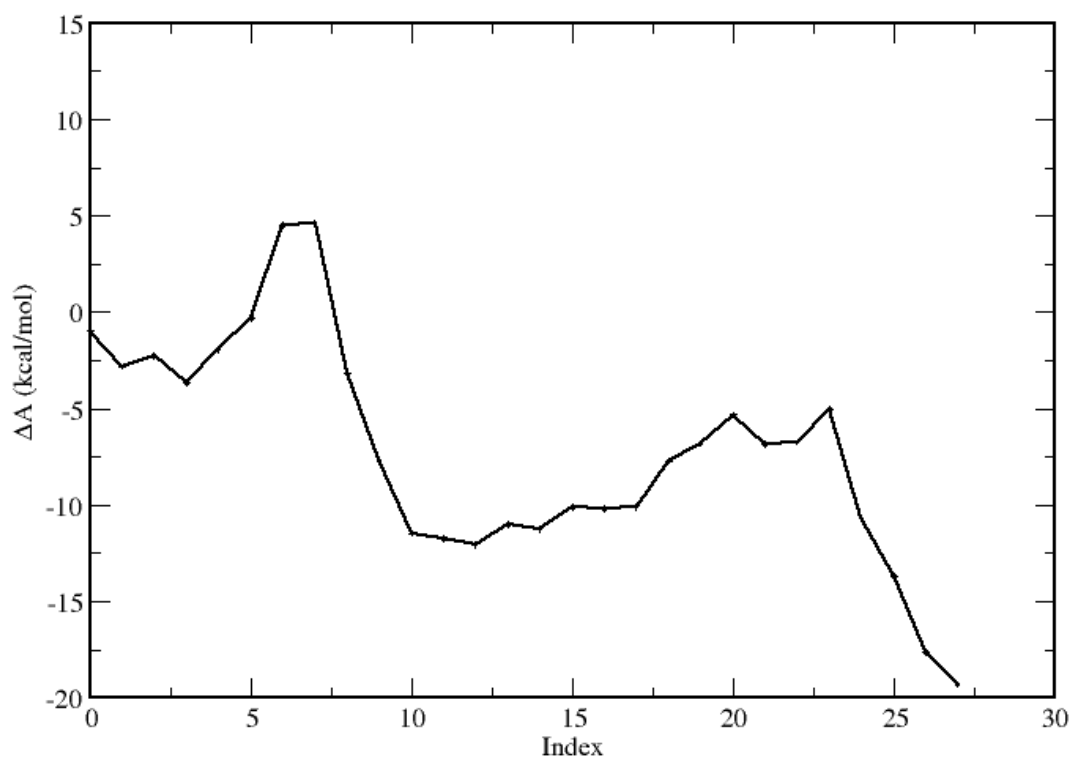

**Figure S4:** The reaction path of second proton transfer process optimized by QM/MM-MFEP in 1D1S model.

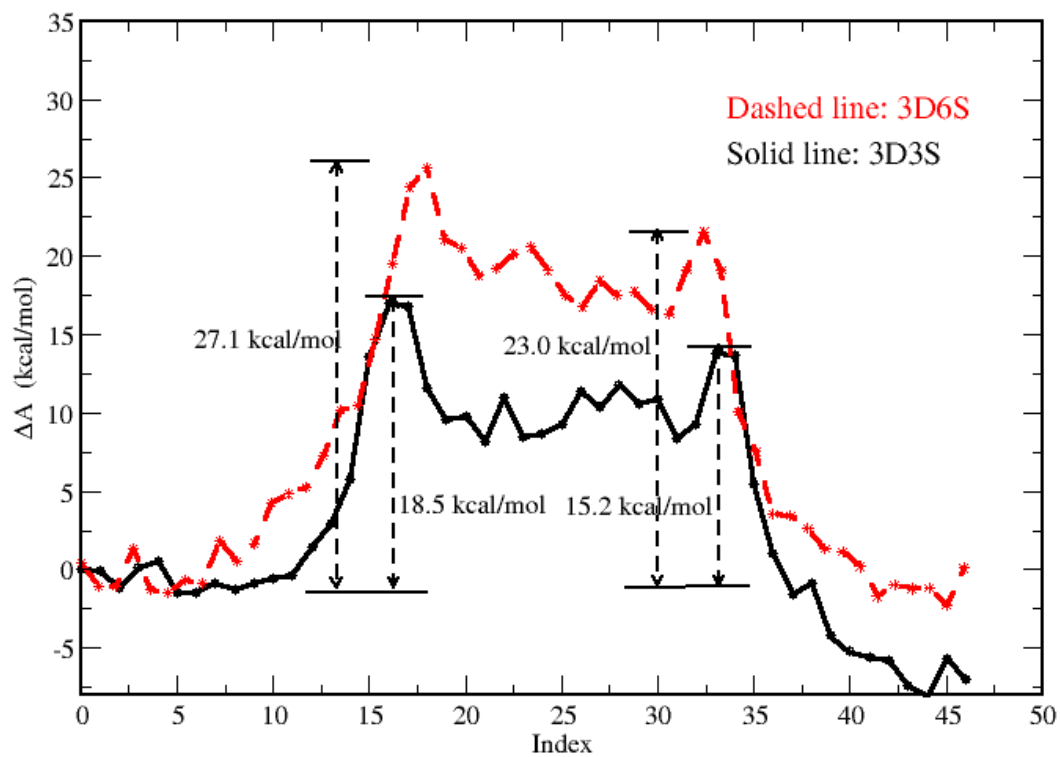

**Figure S5.** The free energy profiles for 3D3S (solid) and 3D6S (dashed). The blue circle points represent the first proton transfer process. The red square points indicate the second proton transfer process.

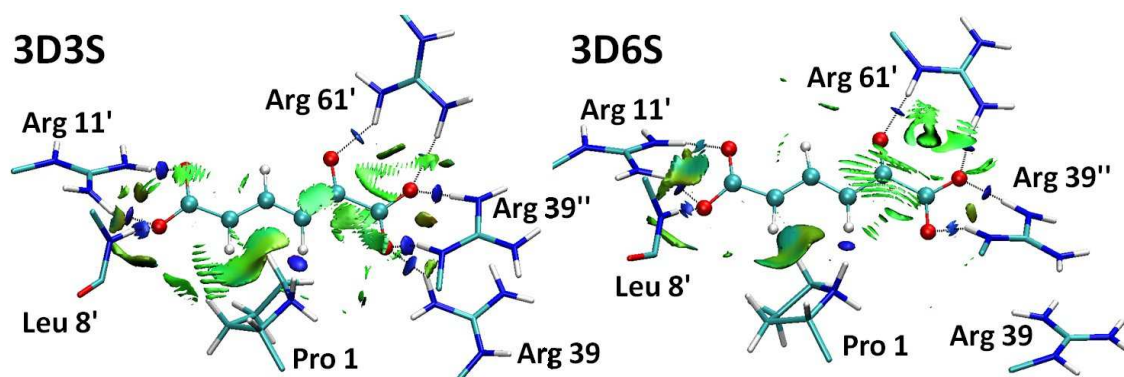

**Figure S6:** NCI topologies of the 3D3S and 3D6S systems.

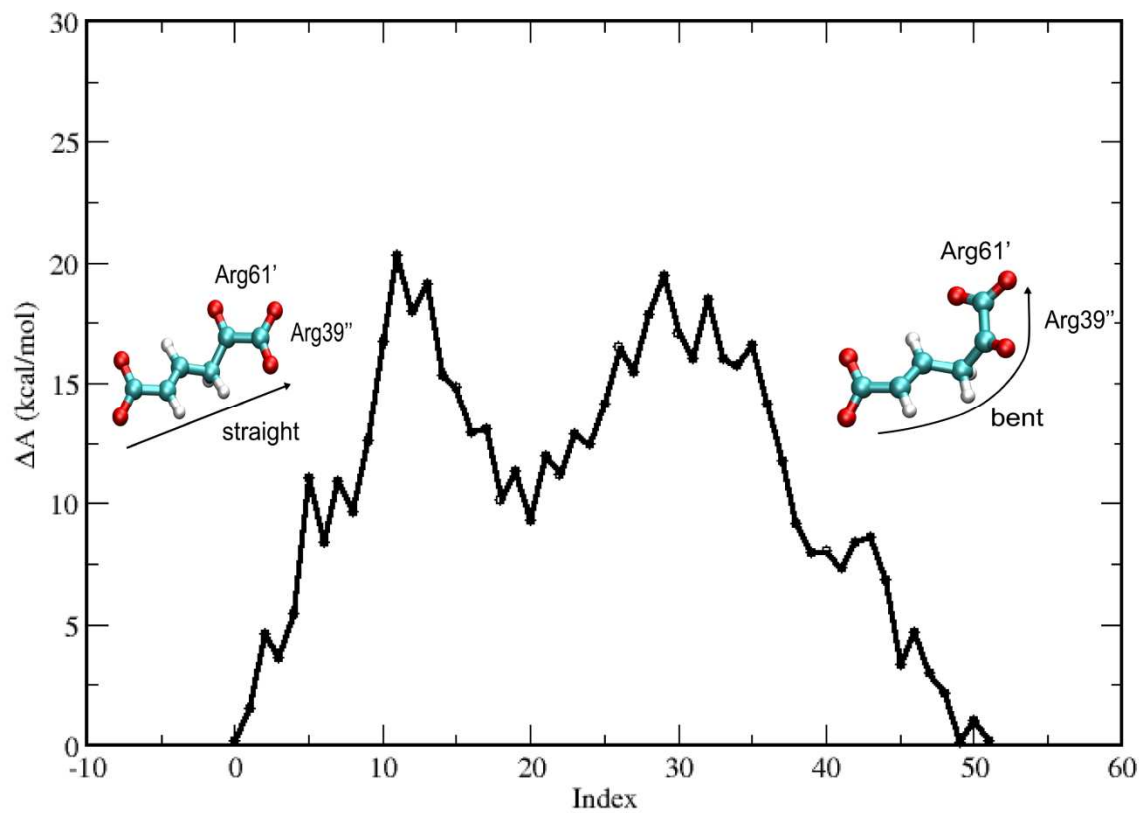

**Figure S7:** Free energy profiles of 2o4hex in 4-OT from “straight” to “bent” conformations.



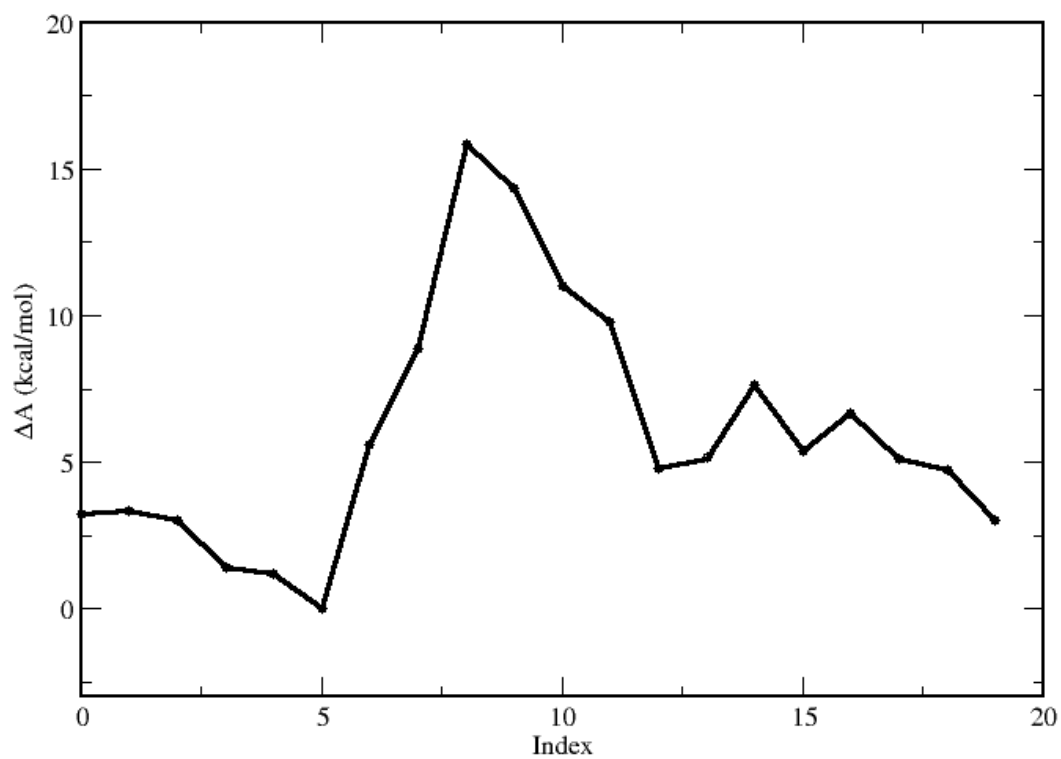

**Figure S8:** Reaction profile of 2o4hex with the bent conformation as reactant for the first proton transfer step.

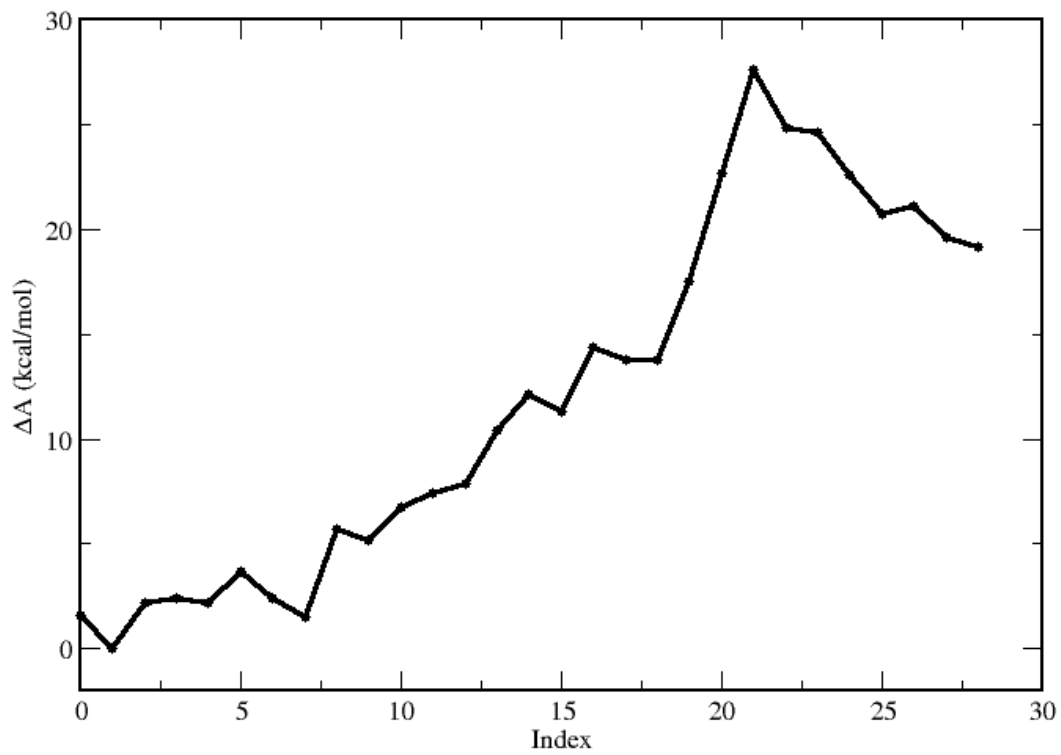

**Figure S9:** Reaction profile of protonated 2HM as a reactant for the first reaction step.

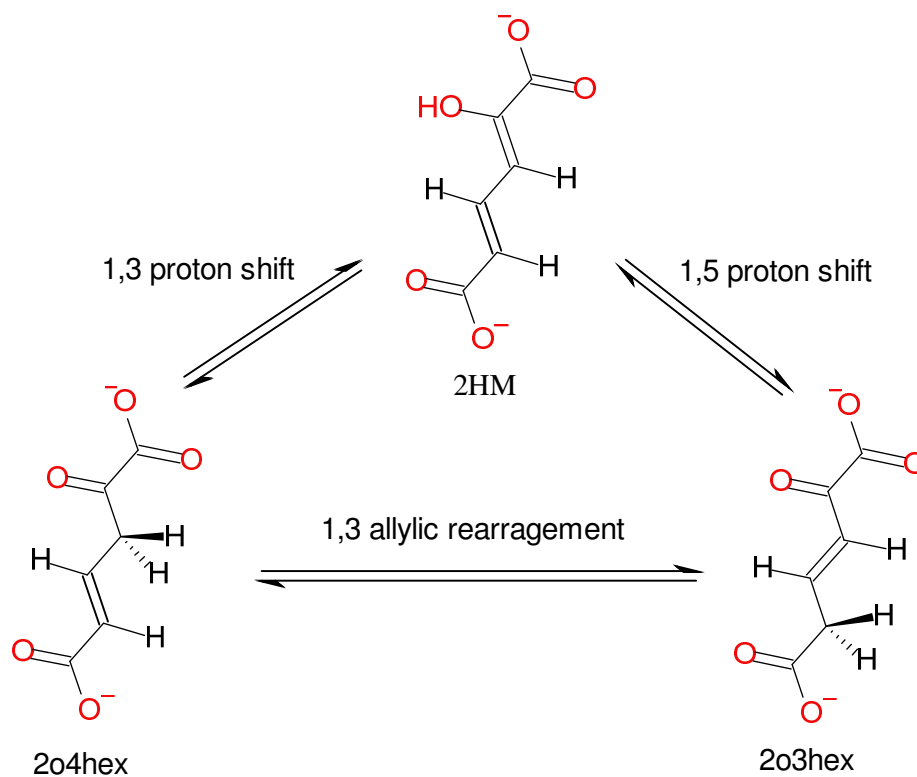

**Figure S10:** All the possible chemical reaction channels involved in 4-OT. 1,3 proton shift occurs quickly between 2HM and 2o4hex in aqueous solution. Presumably, 4-OT can either open a new channel of the 1,3 allylic rearrangement to convert 2o4hex to 2o3hex or directly converts 2HM to 2o3hex by 1,5 proton shift.

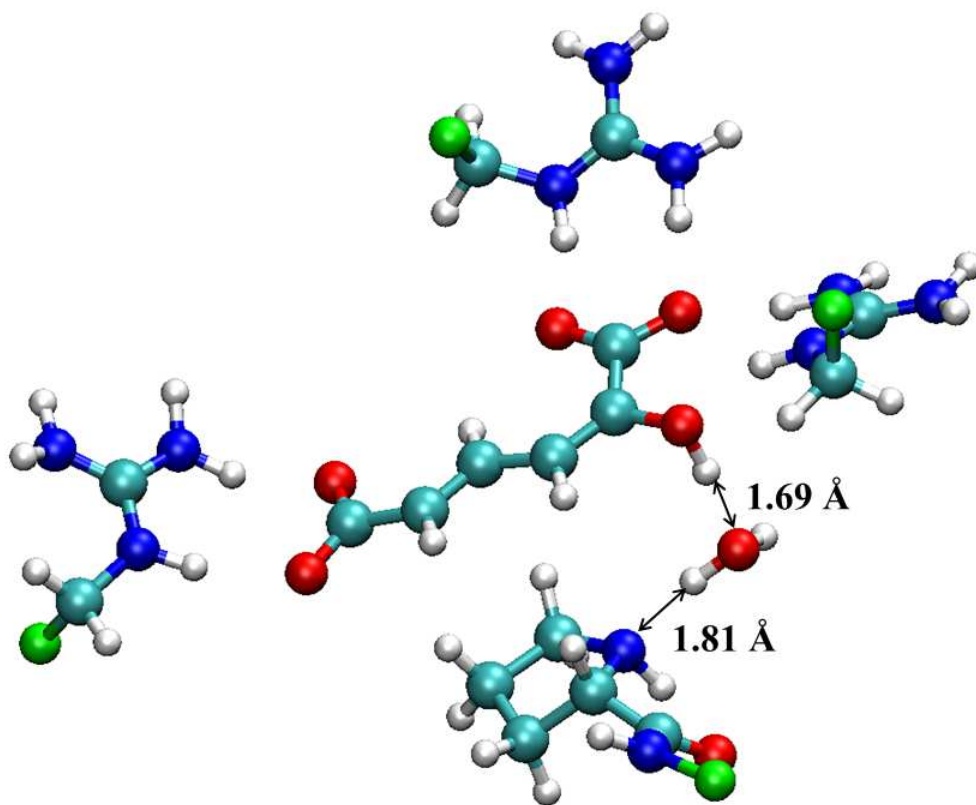

Figure S11. The optimized reactant structure with 2HM, Pro1, one water molecule, Arg39'', Arg61', and Arg11'. (carbon: cyan; oxygen: red; hydrogen: white; nitrogen: blue; and pseudoatom: green)

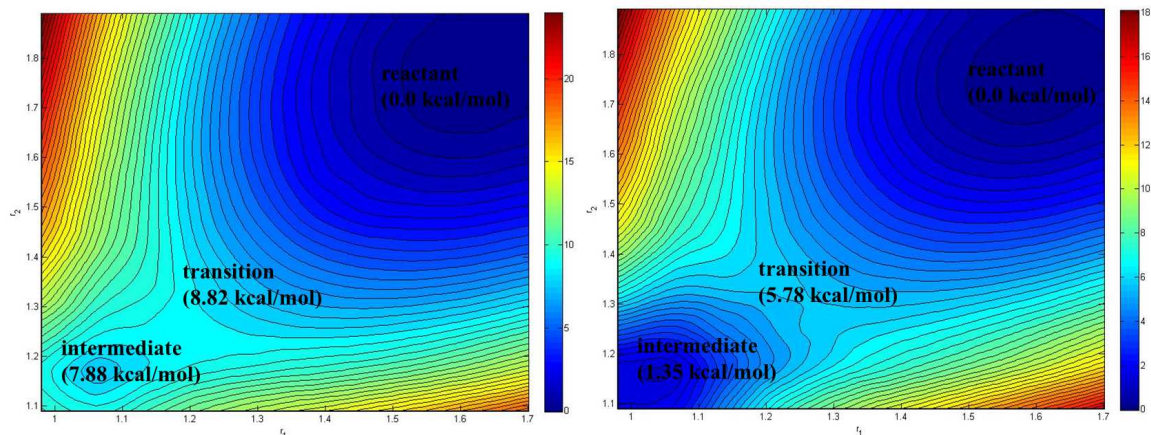

(a) gas phase

(b) implicit solvent model (CPCM)

Figure S12. Two-dimension energy surface for the first proton transfer reaction with 2HM as reactant via water mediate reaction mechanism. The reaction coordinates are chosen as:  $r_1$  represents distance between 2-hydroxyl hydrogen and water oxygen;  $r_2$  represents distance between water hydrogen and proline nitrogen.

## II. Supporting tables

Table S1: Average dihedral angles defined by Pro1-N, Pro1-CA, Pro1-CD, and substrate-C4 in 3D3S and 3D6S from 2.4 ns MD simulations

|            | 3D3S   | 3D6S   |
|------------|--------|--------|
| Mean Value | -62.41 | -59.62 |
| RMSD       | 5.70   | 7.35   |

Table S2: Average dihedral angles defined by Pro1-N, Pro1-CA, Pro1-CD, and substrate-C4 from 32 ps direct QM/MM MD simulations in 3D3S

| MD Runs    | 1      | 2       | 3      | 4      | 5      |
|------------|--------|---------|--------|--------|--------|
| Mean Value | -91.74 | -103.95 | -98.23 | -72.30 | -76.05 |
| RMSD       | 15.83  | 20.87   | 19.88  | 19.09  | 19.33  |

Table S3: Average distances between *Pro-R* proton at C3 site in 2o4hex and Pro-N from five independent 32 ps direct QM/MM MD simulations (unit Å)

| MD Runs    | 1    | 2    | 3    | 4    | 5    |
|------------|------|------|------|------|------|
| Mean Value | 3.40 | 4.87 | 3.74 | 3.52 | 3.26 |
| RMSD       | 0.36 | 0.78 | 0.71 | 0.61 | 0.59 |

Table S4: Average distances between the proton on 2-keto oxygen in 2HM and Pro-N from five independent 32 ps direct QM/MM MD simulations (unit Å)

| MD Runs    | 1    | 2    | 3    | 4    | 5    |
|------------|------|------|------|------|------|
| Mean Value | 5.24 | 5.28 | 4.69 | 5.07 | 4.74 |
| RMSD       | 0.50 | 0.47 | 0.59 | 0.43 | 0.60 |

### **III Non-Covalent Index (NCI) analysis details**

The Non Covalent Interaction (NCI) analysis is a newly defined index based on the study of the density and the reduced density gradient. As previously described [Johnson, E. *et al*, J. Am. Chem. Soc., 132, 6498 (2010), Contreras-Garcia, J. *et al*. J. Chem. Theory. Comput., 7, 625 (2011)] it is possible to link the non-covalent interaction to the low reduce density gradient/low density area, the different local minima of the reduced gradient being named NCI Critical Point of Interaction (CPI). In addition, as previously stated, it is possible to link the density at the NCI CPI to the strength of the interaction [Contreras-Garcia, J., *et al*, J. Phys. Chem. A, 115, 12983 (2011)]. The NCI analyses were performed with NCIPLOT software using promolecular densities. The geometries were extracted from typical MD simulation snapshot. The ligand keyword was used in order to visualize only the interactions between the ligand (deprotonated 2HM) and the protein within 5Å of the ligand, with a grid interval 0.2, 0.2, 0.2 Å along each dimension. In Figure S6, the color ranges for densities from -0.04 to 0.04 au and the surfaces correspond to a reduced density gradient lower or equal to 0.3.

### **IV. Direct QM/MM MD computational details.**

The initial crystal structure is taken from PDB: 1BJP, with the inhibitor substituted by the 2o4hex/2HM reactant. The QM subsystem in this direct MD simulation only includes one substrate. The other two substrates (2o4hex) are modeled with the classical force field. The integration step for short, medium and long distance interactions are 1, 4, and 8 fs, respectively.

The pair list is updated every 8 fs. This system is solvated in a rectangular box  $90 \times 90 \times 90 \text{ \AA}^3$  with 21,477 TIP3P water molecules. Energy minimization and series constraints were added to warm up the system to 300K. Five independent computations are carried out. The trajectories are saved at each 32 fs and 1000 snapshots were generated in the total 32 ps simulations.

## V. 2HM vs 2o4hex: an experimental view

With the stereochemistry study of YwhB, a 4-OT homologue, Johnson, W.H. *et al* [Biochemistry, 46, 11919 (2007)] proposed that “the conversion of 2o4hex and 2HM may not be enzyme-catalyzed, and this observation could further suggest that 4-OT does not catalyze a 1,3-allylic rearrangement of 2o4hex to 2o3hex, but instead, may simply catalyze the conversion of 2HM to 2o3hex”. To clarify the reactant issue in 4-OT, we list all the possible reaction channels in Figure S10. We think Johnson’s stereochemistry argument cannot rule out the 1,3 allylic rearrangement of 2o4hex to 2o3hex because *the deprotonated 2HM, not protonated 2HM, is the intermediate state in 4-OT. Therefore, the inter-conversion between 2o4hex and 2o3hex does not go through the protonated 2HM*. We think some of experimental studies did not realize two different protonation states of 2HM. Even if interconversion of 2o4hex and 2HM may not be enzyme-catalyzed, this cannot prove that 4-OT does not catalyze 1,3-allylic rearrangement between 2o4hex and 2o3hex. Furthermore, since the tail part (6-carboxyl group) of substrate is anchored strongly by Arg11’ and Leu8’, the abstracted proton can only be transferred to the *Si* face. With the racemate 2o4hex substrate, a stereospecific 2o3hex can also be generated. The arguments from experimental studies about the reactant state are thus rendered ineffective by the



fast conversion between 2HM and 2o4hex. Based on our theoretical studies, 2o4hex is still a plausible reactant.

## VI. 2HM as reactant: simulation details

The force field parameters for 2HM are generated using MATCH program. The molecular dynamics simulations preparations are same as in 3D3S model. Three independent 640 ps simulations are carried out for both straight and bent conformation, and 200 snapshots are taken during each trajectory, with a 3.2 ps interval.

After the 640 ps MD simulation, a structure is taken out for further QM/MM MFEP optimization. In this QM/MM calculation, besides previous QM active site (Pro1 and substrate), three arginine residues (Arg39'', Arg61', Arg11') side chains are also included in the QM region. The pseudo-atom for three arginine residues are the CG atoms, and pseudo-atom basis parameters is taken from Ref.28. The QM active site model is constructed based on the QM part of QM/MM optimization, with all arginine pseudo-atoms replaced by hydrogen atoms, and the Pro1 is terminated with methyl group. Total atom number in the QM active site model is 74. In QM calculation, we fixed all protein residue side chain carbon atoms, and the QM calculation is carried out in Gaussian 09, with B3LYP/6-31G(d) level, within gas phase and implicit solvent model (CPCM). Two reactions coordinate, distance between 2-hydroxyl hydrogen – water oxygen and hydrogen on water – Pro-N, were chosen to scan the 2-D reaction energy profile.

## VII. Structure coordinates for reactant, intermediate, and product states

Reactant state:

|      |   |     |     |   |        |       |         |
|------|---|-----|-----|---|--------|-------|---------|
| ATOM | 1 | N   | PRO | 1 | -2.514 | 0.069 | -15.109 |
| ATOM | 2 | HN1 | PRO | 1 | -1.503 | 0.084 | -15.215 |

|      |      |      |     |    |         |        |         |
|------|------|------|-----|----|---------|--------|---------|
| ATOM | 3    | HN2  | PRO | 1  | -3.088  | 2.220  | -15.490 |
| ATOM | 4    | CD   | PRO | 1  | -3.098  | -0.780 | -16.178 |
| ATOM | 5    | CA   | PRO | 1  | -2.871  | -0.495 | -13.795 |
| ATOM | 6    | HA   | PRO | 1  | -3.531  | 0.204  | -13.262 |
| ATOM | 7    | HD1  | PRO | 1  | -4.056  | -0.362 | -16.503 |
| ATOM | 8    | HD2  | PRO | 1  | -2.433  | -0.787 | -17.047 |
| ATOM | 9    | CB   | PRO | 1  | -3.661  | -1.814 | -14.085 |
| ATOM | 10   | HB1  | PRO | 1  | -4.729  | -1.592 | -14.001 |
| ATOM | 11   | HB2  | PRO | 1  | -3.428  | -2.616 | -13.377 |
| ATOM | 12   | CG   | PRO | 1  | -3.299  | -2.158 | -15.539 |
| ATOM | 13   | HG1  | PRO | 1  | -4.080  | -2.739 | -16.036 |
| ATOM | 14   | HG2  | PRO | 1  | -2.363  | -2.730 | -15.586 |
| ATOM | 15   | C    | PRO | 1  | -1.609  | -0.625 | -12.938 |
| ATOM | 16   | O    | PRO | 1  | -0.472  | -0.452 | -13.394 |
| ATOM | 598  | N    | ARG | 39 | 2.088   | -0.499 | -14.196 |
| ATOM | 599  | HN   | ARG | 39 | 1.087   | -0.706 | -13.701 |
| ATOM | 600  | CA   | ARG | 39 | 3.000   | 0.079  | -13.229 |
| ATOM | 601  | HA   | ARG | 39 | 3.918   | 0.459  | -13.750 |
| ATOM | 602  | CB   | ARG | 39 | 2.403   | 1.298  | -12.445 |
| ATOM | 603  | HB1  | ARG | 39 | 2.864   | 1.429  | -11.457 |
| ATOM | 604  | HB2  | ARG | 39 | 1.311   | 1.055  | -12.359 |
| ATOM | 605  | CG   | ARG | 39 | 2.588   | 2.621  | -13.162 |
| ATOM | 606  | HG1  | ARG | 39 | 2.309   | 2.550  | -14.288 |
| ATOM | 607  | HG2  | ARG | 39 | 3.627   | 2.935  | -13.163 |
| ATOM | 608  | CD   | ARG | 39 | 1.810   | 3.772  | -12.453 |
| ATOM | 609  | HD1  | ARG | 39 | 2.223   | 3.813  | -11.408 |
| ATOM | 610  | HD2  | ARG | 39 | 0.720   | 3.594  | -12.334 |
| ATOM | 611  | NE   | ARG | 39 | 2.076   | 5.080  | -13.070 |
| ATOM | 612  | HE   | ARG | 39 | 2.688   | 5.716  | -12.581 |
| ATOM | 613  | CZ   | ARG | 39 | 1.774   | 5.372  | -14.350 |
| ATOM | 614  | NH1  | ARG | 39 | 1.177   | 4.537  | -15.163 |
| ATOM | 615  | HH11 | ARG | 39 | 0.779   | 3.685  | -14.892 |
| ATOM | 616  | HH12 | ARG | 39 | 1.080   | 4.778  | -16.135 |
| ATOM | 617  | NH2  | ARG | 39 | 2.114   | 6.597  | -14.773 |
| ATOM | 618  | HH21 | ARG | 39 | 2.780   | 7.114  | -14.248 |
| ATOM | 619  | HH22 | ARG | 39 | 1.826   | 6.855  | -15.701 |
| ATOM | 620  | C    | ARG | 39 | 3.482   | -1.050 | -12.258 |
| ATOM | 621  | O    | ARG | 39 | 2.945   | -1.144 | -11.178 |
| ATOM | 1096 | N    | LEU | 70 | -8.739  | -0.674 | -12.051 |
| ATOM | 1097 | HN   | LEU | 70 | -8.211  | -0.658 | -12.912 |
| ATOM | 1098 | CA   | LEU | 70 | -10.027 | -0.039 | -12.104 |
| ATOM | 1099 | HA   | LEU | 70 | -10.180 | 0.508  | -11.143 |
| ATOM | 1100 | CB   | LEU | 70 | -10.265 | 0.945  | -13.275 |
| ATOM | 1101 | HB1  | LEU | 70 | -11.327 | 1.300  | -13.221 |
| ATOM | 1102 | HB2  | LEU | 70 | -10.217 | 0.451  | -14.281 |
| ATOM | 1103 | CG   | LEU | 70 | -9.413  | 2.235  | -13.218 |
| ATOM | 1104 | HG   | LEU | 70 | -8.325  | 2.039  | -13.044 |
| ATOM | 1105 | CD1  | LEU | 70 | -9.511  | 2.946  | -14.586 |
| ATOM | 1106 | HD11 | LEU | 70 | -9.283  | 2.201  | -15.414 |
| ATOM | 1107 | HD12 | LEU | 70 | -8.744  | 3.814  | -14.700 |
| ATOM | 1108 | HD13 | LEU | 70 | -10.486 | 3.469  | -14.756 |
| ATOM | 1109 | CD2  | LEU | 70 | -9.838  | 3.144  | -11.997 |

|      |      |      |     |     |         |        |         |
|------|------|------|-----|-----|---------|--------|---------|
| ATOM | 1110 | HD21 | LEU | 70  | -9.117  | 4.039  | -12.058 |
| ATOM | 1111 | HD22 | LEU | 70  | -9.612  | 2.632  | -11.045 |
| ATOM | 1112 | HD23 | LEU | 70  | -10.930 | 3.465  | -11.867 |
| ATOM | 1113 | C    | LEU | 70  | -11.170 | -1.083 | -12.108 |
| ATOM | 1114 | O    | LEU | 70  | -11.029 | -2.156 | -12.653 |
| ATOM | 1137 | N    | ARG | 73  | -14.118 | -4.753 | -14.811 |
| ATOM | 1138 | HN   | ARG | 73  | -13.754 | -4.550 | -13.935 |
| ATOM | 1139 | CA   | ARG | 73  | -13.791 | -6.083 | -15.276 |
| ATOM | 1140 | HA   | ARG | 73  | -13.957 | -6.178 | -16.355 |
| ATOM | 1141 | CB   | ARG | 73  | -12.271 | -6.374 | -15.174 |
| ATOM | 1142 | HB1  | ARG | 73  | -12.107 | -7.393 | -15.620 |
| ATOM | 1143 | HB2  | ARG | 73  | -11.901 | -6.410 | -14.149 |
| ATOM | 1144 | CG   | ARG | 73  | -11.408 | -5.426 | -16.032 |
| ATOM | 1145 | HG1  | ARG | 73  | -11.975 | -5.254 | -17.060 |
| ATOM | 1146 | HG2  | ARG | 73  | -10.497 | -5.972 | -16.275 |
| ATOM | 1147 | CD   | ARG | 73  | -10.803 | -4.259 | -15.309 |
| ATOM | 1148 | HD1  | ARG | 73  | -10.343 | -4.556 | -14.340 |
| ATOM | 1149 | HD2  | ARG | 73  | -11.555 | -3.419 | -15.071 |
| ATOM | 1150 | NE   | ARG | 73  | -9.775  | -3.685 | -16.277 |
| ATOM | 1151 | HE   | ARG | 73  | -9.748  | -4.022 | -17.253 |
| ATOM | 1152 | CZ   | ARG | 73  | -8.834  | -2.772 | -15.983 |
| ATOM | 1153 | NH1  | ARG | 73  | -8.667  | -2.360 | -14.750 |
| ATOM | 1154 | HH11 | ARG | 73  | -9.494  | -2.584 | -14.164 |
| ATOM | 1155 | HH12 | ARG | 73  | -7.983  | -1.596 | -14.538 |
| ATOM | 1156 | NH2  | ARG | 73  | -7.992  | -2.273 | -16.880 |
| ATOM | 1157 | HH21 | ARG | 73  | -8.227  | -2.380 | -17.823 |
| ATOM | 1158 | HH22 | ARG | 73  | -7.713  | -1.332 | -16.592 |
| ATOM | 1159 | C    | ARG | 73  | -14.646 | -7.135 | -14.566 |
| ATOM | 1160 | O    | ARG | 73  | -15.304 | -6.813 | -13.530 |
| ATOM | 1909 | N    | ARG | 123 | -10.970 | 9.570  | -20.007 |
| ATOM | 1910 | HN   | ARG | 123 | -10.879 | 9.354  | -19.009 |
| ATOM | 1911 | CA   | ARG | 123 | -11.144 | 8.460  | -20.896 |
| ATOM | 1912 | HA   | ARG | 123 | -11.013 | 8.871  | -21.922 |
| ATOM | 1913 | CB   | ARG | 123 | -10.151 | 7.327  | -20.636 |
| ATOM | 1914 | HB1  | ARG | 123 | -10.269 | 6.408  | -21.312 |
| ATOM | 1915 | HB2  | ARG | 123 | -10.216 | 7.057  | -19.523 |
| ATOM | 1916 | CG   | ARG | 123 | -8.632  | 7.668  | -20.877 |
| ATOM | 1917 | HG1  | ARG | 123 | -8.396  | 8.583  | -20.226 |
| ATOM | 1918 | HG2  | ARG | 123 | -8.355  | 7.864  | -21.935 |
| ATOM | 1919 | CD   | ARG | 123 | -7.792  | 6.501  | -20.343 |
| ATOM | 1920 | HD1  | ARG | 123 | -7.804  | 5.657  | -21.107 |
| ATOM | 1921 | HD2  | ARG | 123 | -8.242  | 6.038  | -19.443 |
| ATOM | 1922 | NE   | ARG | 123 | -6.451  | 7.097  | -20.004 |
| ATOM | 1923 | HE   | ARG | 123 | -6.123  | 7.900  | -20.494 |
| ATOM | 1924 | CZ   | ARG | 123 | -5.419  | 6.400  | -19.480 |
| ATOM | 1925 | NH1  | ARG | 123 | -5.501  | 5.178  | -19.068 |
| ATOM | 1926 | HH11 | ARG | 123 | -6.338  | 4.688  | -19.304 |
| ATOM | 1927 | HH12 | ARG | 123 | -4.591  | 4.826  | -18.786 |
| ATOM | 1928 | NH2  | ARG | 123 | -4.278  | 7.028  | -19.219 |
| ATOM | 1929 | HH21 | ARG | 123 | -4.295  | 8.006  | -19.333 |
| ATOM | 1930 | HH22 | ARG | 123 | -3.654  | 6.667  | -18.569 |
| ATOM | 1931 | C    | ARG | 123 | -12.564 | 7.939  | -20.780 |

|      |      |      |     |     |         |        |         |
|------|------|------|-----|-----|---------|--------|---------|
| ATOM | 1932 | O    | ARG | 123 | -13.513 | 8.682  | -21.091 |
| ATOM | 3532 | N    | ARG | 225 | -0.492  | 10.567 | -10.743 |
| ATOM | 3533 | HN   | ARG | 225 | 0.321   | 10.446 | -10.273 |
| ATOM | 3534 | CA   | ARG | 225 | -1.524  | 9.621  | -10.428 |
| ATOM | 3535 | HA   | ARG | 225 | -2.366  | 10.012 | -10.918 |
| ATOM | 3536 | CB   | ARG | 225 | -1.249  | 8.173  | -10.867 |
| ATOM | 3537 | HB1  | ARG | 225 | -2.154  | 7.597  | -10.517 |
| ATOM | 3538 | HB2  | ARG | 225 | -0.306  | 7.751  | -10.400 |
| ATOM | 3539 | CG   | ARG | 225 | -1.031  | 7.896  | -12.377 |
| ATOM | 3540 | HG1  | ARG | 225 | -0.806  | 6.824  | -12.518 |
| ATOM | 3541 | HG2  | ARG | 225 | -0.117  | 8.448  | -12.672 |
| ATOM | 3542 | CD   | ARG | 225 | -2.307  | 8.354  | -13.166 |
| ATOM | 3543 | HD1  | ARG | 225 | -2.620  | 9.347  | -12.990 |
| ATOM | 3544 | HD2  | ARG | 225 | -3.185  | 7.669  | -12.842 |
| ATOM | 3545 | NE   | ARG | 225 | -2.126  | 8.008  | -14.594 |
| ATOM | 3546 | HE   | ARG | 225 | -2.331  | 7.085  | -14.877 |
| ATOM | 3547 | CZ   | ARG | 225 | -1.602  | 8.834  | -15.498 |
| ATOM | 3548 | NH1  | ARG | 225 | -1.181  | 10.044 | -15.200 |
| ATOM | 3549 | HH11 | ARG | 225 | -1.046  | 10.242 | -14.203 |
| ATOM | 3550 | HH12 | ARG | 225 | -0.876  | 10.743 | -15.863 |
| ATOM | 3551 | NH2  | ARG | 225 | -1.543  | 8.441  | -16.727 |
| ATOM | 3552 | HH21 | ARG | 225 | -2.033  | 7.531  | -16.967 |
| ATOM | 3553 | HH22 | ARG | 225 | -1.348  | 9.150  | -17.434 |
| ATOM | 3554 | C    | ARG | 225 | -1.922  | 9.678  | -8.972  |
| ATOM | 3555 | O    | ARG | 225 | -1.310  | 9.116  | -8.094  |
| ATOM | 5870 | C6   | HMI | 373 | -6.631  | 0.248  | -14.995 |
| ATOM | 5871 | O61  | HMI | 373 | -7.114  | 0.073  | -16.149 |
| ATOM | 5872 | O62  | HMI | 373 | -6.768  | -0.564 | -14.032 |
| ATOM | 5873 | H1   | HMI | 373 | -5.522  | 1.697  | -13.755 |
| ATOM | 5874 | C5   | HMI | 373 | -5.760  | 1.426  | -14.780 |
| ATOM | 5875 | H2   | HMI | 373 | -5.369  | 1.710  | -16.829 |
| ATOM | 5876 | C4   | HMI | 373 | -5.129  | 1.993  | -15.809 |
| ATOM | 5877 | H3   | HMI | 373 | -4.033  | 3.464  | -14.664 |
| ATOM | 5878 | C3   | HMI | 373 | -3.967  | 2.897  | -15.592 |
| ATOM | 5879 | O21  | HMI | 373 | -3.850  | 3.505  | -17.896 |
| ATOM | 5880 | C2   | HMI | 373 | -3.658  | 3.801  | -16.723 |
| ATOM | 5881 | C1   | HMI | 373 | -3.023  | 5.165  | -16.377 |
| ATOM | 5882 | O11  | HMI | 373 | -2.659  | 5.863  | -17.365 |
| ATOM | 5883 | O12  | HMI | 373 | -2.923  | 5.459  | -15.168 |

**Intermediate state:**

|      |   |     |     |   |        |        |         |
|------|---|-----|-----|---|--------|--------|---------|
| ATOM | 1 | N   | PRO | 1 | -2.620 | 0.143  | -15.101 |
| ATOM | 2 | HN1 | PRO | 1 | -1.626 | 0.390  | -15.229 |
| ATOM | 3 | HN2 | PRO | 1 | -3.176 | 1.014  | -15.205 |
| ATOM | 4 | CD  | PRO | 1 | -3.051 | -0.866 | -16.174 |
| ATOM | 5 | CA  | PRO | 1 | -2.863 | -0.455 | -13.728 |
| ATOM | 6 | HA  | PRO | 1 | -3.528 | 0.230  | -13.193 |
| ATOM | 7 | HD1 | PRO | 1 | -4.016 | -0.536 | -16.557 |

|      |      |      |     |    |         |        |         |
|------|------|------|-----|----|---------|--------|---------|
| ATOM | 8    | HD2  | PRO | 1  | -2.318  | -0.844 | -16.979 |
| ATOM | 9    | CB   | PRO | 1  | -3.571  | -1.804 | -14.009 |
| ATOM | 10   | HB1  | PRO | 1  | -4.651  | -1.624 | -13.966 |
| ATOM | 11   | HB2  | PRO | 1  | -3.319  | -2.561 | -13.262 |
| ATOM | 12   | CG   | PRO | 1  | -3.135  | -2.192 | -15.429 |
| ATOM | 13   | HG1  | PRO | 1  | -3.861  | -2.851 | -15.911 |
| ATOM | 14   | HG2  | PRO | 1  | -2.163  | -2.698 | -15.430 |
| ATOM | 15   | C    | PRO | 1  | -1.524  | -0.534 | -12.996 |
| ATOM | 16   | O    | PRO | 1  | -0.451  | -0.310 | -13.559 |
| ATOM | 598  | N    | ARG | 39 | 2.283   | -0.067 | -14.422 |
| ATOM | 599  | HN   | ARG | 39 | 1.416   | 0.056  | -13.971 |
| ATOM | 600  | CA   | ARG | 39 | 3.392   | 0.327  | -13.569 |
| ATOM | 601  | HA   | ARG | 39 | 4.311   | 0.476  | -14.068 |
| ATOM | 602  | CB   | ARG | 39 | 3.227   | 1.544  | -12.665 |
| ATOM | 603  | HB1  | ARG | 39 | 4.120   | 1.789  | -12.031 |
| ATOM | 604  | HB2  | ARG | 39 | 2.273   | 1.460  | -12.154 |
| ATOM | 605  | CG   | ARG | 39 | 3.007   | 2.785  | -13.576 |
| ATOM | 606  | HG1  | ARG | 39 | 2.739   | 2.549  | -14.631 |
| ATOM | 607  | HG2  | ARG | 39 | 4.023   | 3.241  | -13.732 |
| ATOM | 608  | CD   | ARG | 39 | 1.931   | 3.815  | -13.156 |
| ATOM | 609  | HD1  | ARG | 39 | 1.979   | 3.930  | -12.033 |
| ATOM | 610  | HD2  | ARG | 39 | 0.906   | 3.490  | -13.330 |
| ATOM | 611  | NE   | ARG | 39 | 2.183   | 5.214  | -13.761 |
| ATOM | 612  | HE   | ARG | 39 | 2.828   | 5.789  | -13.203 |
| ATOM | 613  | CZ   | ARG | 39 | 1.832   | 5.650  | -14.987 |
| ATOM | 614  | NH1  | ARG | 39 | 1.023   | 4.959  | -15.772 |
| ATOM | 615  | HH11 | ARG | 39 | 0.656   | 4.099  | -15.288 |
| ATOM | 616  | HH12 | ARG | 39 | 0.892   | 5.226  | -16.718 |
| ATOM | 617  | NH2  | ARG | 39 | 2.420   | 6.723  | -15.419 |
| ATOM | 618  | HH21 | ARG | 39 | 3.068   | 7.259  | -14.817 |
| ATOM | 619  | HH22 | ARG | 39 | 2.190   | 7.096  | -16.320 |
| ATOM | 620  | C    | ARG | 39 | 3.638   | -0.854 | -12.648 |
| ATOM | 621  | O    | ARG | 39 | 2.865   | -1.123 | -11.733 |
| ATOM | 1096 | N    | LEU | 70 | -8.397  | -0.805 | -12.030 |
| ATOM | 1097 | HN   | LEU | 70 | -7.761  | -0.666 | -12.760 |
| ATOM | 1098 | CA   | LEU | 70 | -9.622  | -0.061 | -12.063 |
| ATOM | 1099 | HA   | LEU | 70 | -9.842  | 0.380  | -11.111 |
| ATOM | 1100 | CB   | LEU | 70 | -9.529  | 1.148  | -13.060 |
| ATOM | 1101 | HB1  | LEU | 70 | -9.386  | 0.761  | -14.075 |
| ATOM | 1102 | HB2  | LEU | 70 | -8.605  | 1.691  | -12.767 |
| ATOM | 1103 | CG   | LEU | 70 | -10.727 | 2.130  | -13.098 |
| ATOM | 1104 | HG   | LEU | 70 | -11.673 | 1.554  | -13.294 |
| ATOM | 1105 | CD1  | LEU | 70 | -10.967 | 2.925  | -11.787 |
| ATOM | 1106 | HD11 | LEU | 70 | -11.264 | 2.157  | -11.009 |
| ATOM | 1107 | HD12 | LEU | 70 | -11.735 | 3.726  | -11.869 |
| ATOM | 1108 | HD13 | LEU | 70 | -9.990  | 3.378  | -11.490 |
| ATOM | 1109 | CD2  | LEU | 70 | -10.387 | 3.097  | -14.266 |
| ATOM | 1110 | HD21 | LEU | 70 | -10.125 | 2.540  | -15.240 |
| ATOM | 1111 | HD22 | LEU | 70 | -9.383  | 3.610  | -14.040 |
| ATOM | 1112 | HD23 | LEU | 70 | -11.232 | 3.787  | -14.517 |
| ATOM | 1113 | C    | LEU | 70 | -10.793 | -0.928 | -12.379 |
| ATOM | 1114 | O    | LEU | 70 | -10.671 | -1.954 | -13.076 |

|      |      |      |     |     |         |        |         |
|------|------|------|-----|-----|---------|--------|---------|
| ATOM | 1137 | N    | ARG | 73  | -13.744 | -4.770 | -14.983 |
| ATOM | 1138 | HN   | ARG | 73  | -14.013 | -4.555 | -13.994 |
| ATOM | 1139 | CA   | ARG | 73  | -13.076 | -6.091 | -15.281 |
| ATOM | 1140 | HA   | ARG | 73  | -13.042 | -6.191 | -16.343 |
| ATOM | 1141 | CB   | ARG | 73  | -11.663 | -6.217 | -14.686 |
| ATOM | 1142 | HB1  | ARG | 73  | -11.407 | -7.284 | -14.516 |
| ATOM | 1143 | HB2  | ARG | 73  | -11.704 | -5.787 | -13.693 |
| ATOM | 1144 | CG   | ARG | 73  | -10.483 | -5.522 | -15.356 |
| ATOM | 1145 | HG1  | ARG | 73  | -10.376 | -6.174 | -16.277 |
| ATOM | 1146 | HG2  | ARG | 73  | -9.424  | -5.635 | -14.865 |
| ATOM | 1147 | CD   | ARG | 73  | -10.635 | -4.062 | -15.843 |
| ATOM | 1148 | HD1  | ARG | 73  | -10.831 | -3.324 | -15.022 |
| ATOM | 1149 | HD2  | ARG | 73  | -11.392 | -3.867 | -16.616 |
| ATOM | 1150 | NE   | ARG | 73  | -9.293  | -3.775 | -16.469 |
| ATOM | 1151 | HE   | ARG | 73  | -9.226  | -3.971 | -17.452 |
| ATOM | 1152 | CZ   | ARG | 73  | -8.390  | -2.926 | -15.956 |
| ATOM | 1153 | NH1  | ARG | 73  | -8.359  | -2.321 | -14.777 |
| ATOM | 1154 | HH11 | ARG | 73  | -9.230  | -2.327 | -14.283 |
| ATOM | 1155 | HH12 | ARG | 73  | -7.592  | -1.734 | -14.472 |
| ATOM | 1156 | NH2  | ARG | 73  | -7.426  | -2.464 | -16.791 |
| ATOM | 1157 | HH21 | ARG | 73  | -7.509  | -2.759 | -17.810 |
| ATOM | 1158 | HH22 | ARG | 73  | -7.087  | -1.565 | -16.692 |
| ATOM | 1159 | C    | ARG | 73  | -13.939 | -7.183 | -14.773 |
| ATOM | 1160 | O    | ARG | 73  | -14.615 | -7.072 | -13.774 |
| ATOM | 1909 | N    | ARG | 123 | -10.681 | 10.056 | -19.845 |
| ATOM | 1910 | HN   | ARG | 123 | -10.573 | 9.860  | -18.847 |
| ATOM | 1911 | CA   | ARG | 123 | -10.670 | 8.926  | -20.766 |
| ATOM | 1912 | HA   | ARG | 123 | -10.246 | 9.263  | -21.717 |
| ATOM | 1913 | CB   | ARG | 123 | -9.785  | 7.767  | -20.340 |
| ATOM | 1914 | HB1  | ARG | 123 | -9.865  | 6.932  | -21.137 |
| ATOM | 1915 | HB2  | ARG | 123 | -10.242 | 7.343  | -19.409 |
| ATOM | 1916 | CG   | ARG | 123 | -8.355  | 8.116  | -20.036 |
| ATOM | 1917 | HG1  | ARG | 123 | -8.274  | 8.682  | -19.124 |
| ATOM | 1918 | HG2  | ARG | 123 | -7.915  | 8.715  | -20.869 |
| ATOM | 1919 | CD   | ARG | 123 | -7.588  | 6.766  | -19.749 |
| ATOM | 1920 | HD1  | ARG | 123 | -7.587  | 5.979  | -20.557 |
| ATOM | 1921 | HD2  | ARG | 123 | -8.045  | 6.316  | -18.832 |
| ATOM | 1922 | NE   | ARG | 123 | -6.171  | 7.182  | -19.420 |
| ATOM | 1923 | HE   | ARG | 123 | -5.899  | 8.119  | -19.695 |
| ATOM | 1924 | CZ   | ARG | 123 | -5.239  | 6.351  | -18.985 |
| ATOM | 1925 | NH1  | ARG | 123 | -5.480  | 5.103  | -18.618 |
| ATOM | 1926 | HH11 | ARG | 123 | -6.403  | 4.847  | -18.338 |
| ATOM | 1927 | HH12 | ARG | 123 | -4.658  | 4.630  | -18.255 |
| ATOM | 1928 | NH2  | ARG | 123 | -4.004  | 6.826  | -18.866 |
| ATOM | 1929 | HH21 | ARG | 123 | -3.814  | 7.749  | -19.108 |
| ATOM | 1930 | HH22 | ARG | 123 | -3.316  | 6.435  | -18.196 |
| ATOM | 1931 | C    | ARG | 123 | -12.154 | 8.393  | -21.100 |
| ATOM | 1932 | O    | ARG | 123 | -12.858 | 7.746  | -20.308 |
| ATOM | 3532 | N    | ARG | 225 | -0.162  | 9.819  | -10.065 |
| ATOM | 3533 | HN   | ARG | 225 | 0.580   | 9.663  | -9.449  |
| ATOM | 3534 | CA   | ARG | 225 | -1.370  | 9.120  | -9.892  |
| ATOM | 3535 | HA   | ARG | 225 | -2.165  | 9.596  | -10.484 |

|      |      |      |     |     |        |        |         |
|------|------|------|-----|-----|--------|--------|---------|
| ATOM | 3536 | CB   | ARG | 225 | -1.280 | 7.599  | -10.164 |
| ATOM | 3537 | HB1  | ARG | 225 | -1.907 | 7.003  | -9.554  |
| ATOM | 3538 | HB2  | ARG | 225 | -0.263 | 7.343  | -9.838  |
| ATOM | 3539 | CG   | ARG | 225 | -1.712 | 7.164  | -11.631 |
| ATOM | 3540 | HG1  | ARG | 225 | -2.745 | 7.519  | -11.764 |
| ATOM | 3541 | HG2  | ARG | 225 | -1.673 | 6.059  | -11.653 |
| ATOM | 3542 | CD   | ARG | 225 | -0.829 | 7.811  | -12.670 |
| ATOM | 3543 | HD1  | ARG | 225 | 0.246  | 7.595  | -12.606 |
| ATOM | 3544 | HD2  | ARG | 225 | -0.937 | 8.874  | -12.479 |
| ATOM | 3545 | NE   | ARG | 225 | -1.268 | 7.465  | -14.016 |
| ATOM | 3546 | HE   | ARG | 225 | -1.960 | 6.694  | -14.267 |
| ATOM | 3547 | CZ   | ARG | 225 | -0.970 | 8.285  | -15.067 |
| ATOM | 3548 | NH1  | ARG | 225 | -0.158 | 9.343  | -14.851 |
| ATOM | 3549 | HH11 | ARG | 225 | 0.113  | 9.542  | -13.967 |
| ATOM | 3550 | HH12 | ARG | 225 | -0.041 | 9.918  | -15.625 |
| ATOM | 3551 | NH2  | ARG | 225 | -1.353 | 8.138  | -16.356 |
| ATOM | 3552 | HH21 | ARG | 225 | -1.933 | 7.293  | -16.555 |
| ATOM | 3553 | HH22 | ARG | 225 | -1.056 | 8.820  | -17.041 |
| ATOM | 3554 | C    | ARG | 225 | -1.820 | 9.251  | -8.462  |
| ATOM | 3555 | O    | ARG | 225 | -0.991 | 9.179  | -7.520  |
| ATOM | 5870 | C6   | HMI | 373 | -6.307 | 0.184  | -14.946 |
| ATOM | 5871 | O61  | HMI | 373 | -6.662 | -0.069 | -16.136 |
| ATOM | 5872 | O62  | HMI | 373 | -6.477 | -0.625 | -13.976 |
| ATOM | 5873 | H1   | HMI | 373 | -5.416 | 1.724  | -13.664 |
| ATOM | 5874 | C5   | HMI | 373 | -5.573 | 1.420  | -14.696 |
| ATOM | 5875 | H2   | HMI | 373 | -5.193 | 1.816  | -16.741 |
| ATOM | 5876 | C4   | HMI | 373 | -5.015 | 2.129  | -15.713 |
| ATOM | 5877 | H3   | HMI | 373 | -4.131 | 3.679  | -14.501 |
| ATOM | 5878 | C3   | HMI | 373 | -4.177 | 3.243  | -15.488 |
| ATOM | 5879 | O51  | HMI | 373 | -3.412 | 3.496  | -17.718 |
| ATOM | 5880 | C2   | HMI | 373 | -3.496 | 3.883  | -16.497 |
| ATOM | 5881 | C1   | HMI | 373 | -2.853 | 5.202  | -16.124 |
| ATOM | 5882 | O11  | HMI | 373 | -2.376 | 5.878  | -17.087 |
| ATOM | 5883 | O12  | HMI | 373 | -2.835 | 5.570  | -14.923 |

**Product state:**

|      |    |     |     |   |        |        |         |
|------|----|-----|-----|---|--------|--------|---------|
| ATOM | 1  | N   | PRO | 1 | -2.341 | -0.159 | -15.098 |
| ATOM | 2  | HN1 | PRO | 1 | -1.331 | -0.147 | -15.236 |
| ATOM | 3  | HN2 | PRO | 1 | -4.067 | 1.503  | -14.299 |
| ATOM | 4  | CD  | PRO | 1 | -2.934 | -0.943 | -16.215 |
| ATOM | 5  | CA  | PRO | 1 | -2.624 | -0.860 | -13.825 |
| ATOM | 6  | HA  | PRO | 1 | -3.390 | -0.305 | -13.270 |
| ATOM | 7  | HD1 | PRO | 1 | -3.942 | -0.589 | -16.433 |
| ATOM | 8  | HD2 | PRO | 1 | -2.333 | -0.802 | -17.117 |
| ATOM | 9  | CB  | PRO | 1 | -3.235 | -2.248 | -14.215 |
| ATOM | 10 | HB1 | PRO | 1 | -4.312 | -2.183 | -14.042 |
| ATOM | 11 | HB2 | PRO | 1 | -2.835 | -3.075 | -13.619 |
| ATOM | 12 | CG  | PRO | 1 | -2.961 | -2.394 | -15.722 |

|      |      |      |     |    |         |        |         |
|------|------|------|-----|----|---------|--------|---------|
| ATOM | 13   | HG1  | PRO | 1  | -3.732  | -2.989 | -16.223 |
| ATOM | 14   | HG2  | PRO | 1  | -1.991  | -2.870 | -15.903 |
| ATOM | 15   | C    | PRO | 1  | -1.342  | -0.832 | -12.988 |
| ATOM | 16   | O    | PRO | 1  | -0.219  | -0.719 | -13.476 |
| ATOM | 598  | N    | ARG | 39 | 2.451   | 0.383  | -14.124 |
| ATOM | 599  | HN   | ARG | 39 | 1.474   | 0.208  | -13.851 |
| ATOM | 600  | CA   | ARG | 39 | 3.348   | 0.869  | -13.053 |
| ATOM | 601  | HA   | ARG | 39 | 4.174   | 1.344  | -13.527 |
| ATOM | 602  | CB   | ARG | 39 | 2.604   | 1.947  | -12.224 |
| ATOM | 603  | HB1  | ARG | 39 | 3.141   | 2.104  | -11.266 |
| ATOM | 604  | HB2  | ARG | 39 | 1.542   | 1.631  | -12.030 |
| ATOM | 605  | CG   | ARG | 39 | 2.514   | 3.347  | -12.879 |
| ATOM | 606  | HG1  | ARG | 39 | 3.521   | 3.707  | -13.139 |
| ATOM | 607  | HG2  | ARG | 39 | 2.102   | 3.991  | -12.034 |
| ATOM | 608  | CD   | ARG | 39 | 1.473   | 3.471  | -14.024 |
| ATOM | 609  | HD1  | ARG | 39 | 0.417   | 3.220  | -13.811 |
| ATOM | 610  | HD2  | ARG | 39 | 1.935   | 2.783  | -14.771 |
| ATOM | 611  | NE   | ARG | 39 | 1.633   | 4.875  | -14.583 |
| ATOM | 612  | HE   | ARG | 39 | 1.967   | 5.595  | -13.929 |
| ATOM | 613  | CZ   | ARG | 39 | 1.187   | 5.287  | -15.798 |
| ATOM | 614  | NH1  | ARG | 39 | 0.609   | 4.494  | -16.693 |
| ATOM | 615  | HH11 | ARG | 39 | 0.589   | 3.537  | -16.468 |
| ATOM | 616  | HH12 | ARG | 39 | 0.377   | 4.717  | -17.641 |
| ATOM | 617  | NH2  | ARG | 39 | 1.290   | 6.545  | -16.057 |
| ATOM | 618  | HH21 | ARG | 39 | 1.683   | 7.107  | -15.401 |
| ATOM | 619  | HH22 | ARG | 39 | 1.151   | 6.910  | -16.964 |
| ATOM | 620  | C    | ARG | 39 | 3.791   | -0.284 | -12.139 |
| ATOM | 621  | O    | ARG | 39 | 2.911   | -0.896 | -11.512 |
| ATOM | 1096 | N    | LEU | 70 | -7.991  | -0.862 | -12.502 |
| ATOM | 1097 | HN   | LEU | 70 | -7.297  | -0.656 | -13.176 |
| ATOM | 1098 | CA   | LEU | 70 | -9.355  | -0.349 | -12.801 |
| ATOM | 1099 | HA   | LEU | 70 | -9.823  | 0.110  | -12.020 |
| ATOM | 1100 | CB   | LEU | 70 | -9.377  | 0.743  | -13.854 |
| ATOM | 1101 | HB1  | LEU | 70 | -10.391 | 0.873  | -14.242 |
| ATOM | 1102 | HB2  | LEU | 70 | -8.736  | 0.378  | -14.753 |
| ATOM | 1103 | CG   | LEU | 70 | -9.012  | 2.143  | -13.287 |
| ATOM | 1104 | HG   | LEU | 70 | -8.210  | 2.023  | -12.548 |
| ATOM | 1105 | CD1  | LEU | 70 | -8.608  | 3.143  | -14.407 |
| ATOM | 1106 | HD11 | LEU | 70 | -7.648  | 2.907  | -14.920 |
| ATOM | 1107 | HD12 | LEU | 70 | -8.448  | 4.092  | -13.955 |
| ATOM | 1108 | HD13 | LEU | 70 | -9.412  | 3.279  | -15.107 |
| ATOM | 1109 | CD2  | LEU | 70 | -10.261 | 2.755  | -12.599 |
| ATOM | 1110 | HD21 | LEU | 70 | -10.274 | 2.437  | -11.515 |
| ATOM | 1111 | HD22 | LEU | 70 | -11.217 | 2.481  | -13.063 |
| ATOM | 1112 | HD23 | LEU | 70 | -10.301 | 3.860  | -12.677 |
| ATOM | 1113 | C    | LEU | 70 | -10.331 | -1.507 | -13.199 |
| ATOM | 1114 | O    | LEU | 70 | -9.913  | -2.494 | -13.817 |
| ATOM | 1137 | N    | ARG | 73 | -12.178 | -5.294 | -16.716 |
| ATOM | 1138 | HN   | ARG | 73 | -11.734 | -4.904 | -15.892 |
| ATOM | 1139 | CA   | ARG | 73 | -11.708 | -6.600 | -17.132 |
| ATOM | 1140 | HA   | ARG | 73 | -11.799 | -6.641 | -18.136 |
| ATOM | 1141 | CB   | ARG | 73 | -10.179 | -6.834 | -16.868 |



|      |      |      |     |     |         |        |         |
|------|------|------|-----|-----|---------|--------|---------|
| ATOM | 1142 | HB1  | ARG | 73  | -9.977  | -7.845 | -17.336 |
| ATOM | 1143 | HB2  | ARG | 73  | -9.998  | -6.837 | -15.814 |
| ATOM | 1144 | CG   | ARG | 73  | -9.313  | -5.707 | -17.495 |
| ATOM | 1145 | HG1  | ARG | 73  | -9.789  | -5.158 | -18.337 |
| ATOM | 1146 | HG2  | ARG | 73  | -8.518  | -6.309 | -17.893 |
| ATOM | 1147 | CD   | ARG | 73  | -8.723  | -4.703 | -16.509 |
| ATOM | 1148 | HD1  | ARG | 73  | -8.048  | -5.120 | -15.786 |
| ATOM | 1149 | HD2  | ARG | 73  | -9.679  | -4.228 | -16.056 |
| ATOM | 1150 | NE   | ARG | 73  | -8.054  | -3.628 | -17.327 |
| ATOM | 1151 | HE   | ARG | 73  | -7.952  | -3.747 | -18.309 |
| ATOM | 1152 | CZ   | ARG | 73  | -7.254  | -2.658 | -16.797 |
| ATOM | 1153 | NH1  | ARG | 73  | -7.262  | -2.456 | -15.515 |
| ATOM | 1154 | HH11 | ARG | 73  | -8.149  | -2.639 | -15.039 |
| ATOM | 1155 | HH12 | ARG | 73  | -6.702  | -1.709 | -15.277 |
| ATOM | 1156 | NH2  | ARG | 73  | -6.615  | -1.786 | -17.560 |
| ATOM | 1157 | HH21 | ARG | 73  | -6.790  | -1.663 | -18.519 |
| ATOM | 1158 | HH22 | ARG | 73  | -6.420  | -0.946 | -17.063 |
| ATOM | 1159 | C    | ARG | 73  | -12.492 | -7.680 | -16.506 |
| ATOM | 1160 | O    | ARG | 73  | -12.950 | -7.668 | -15.350 |
| ATOM | 1909 | N    | ARG | 123 | -10.833 | 8.728  | -19.907 |
| ATOM | 1910 | HN   | ARG | 123 | -11.026 | 8.634  | -18.922 |
| ATOM | 1911 | CA   | ARG | 123 | -10.645 | 7.487  | -20.625 |
| ATOM | 1912 | HA   | ARG | 123 | -10.099 | 7.721  | -21.496 |
| ATOM | 1913 | CB   | ARG | 123 | -9.770  | 6.504  | -19.857 |
| ATOM | 1914 | HB1  | ARG | 123 | -9.406  | 5.567  | -20.387 |
| ATOM | 1915 | HB2  | ARG | 123 | -10.315 | 6.240  | -18.903 |
| ATOM | 1916 | CG   | ARG | 123 | -8.386  | 7.191  | -19.451 |
| ATOM | 1917 | HG1  | ARG | 123 | -7.887  | 6.449  | -18.845 |
| ATOM | 1918 | HG2  | ARG | 123 | -8.606  | 7.978  | -18.764 |
| ATOM | 1919 | CD   | ARG | 123 | -7.464  | 7.526  | -20.679 |
| ATOM | 1920 | HD1  | ARG | 123 | -7.930  | 8.166  | -21.431 |
| ATOM | 1921 | HD2  | ARG | 123 | -7.301  | 6.554  | -21.172 |
| ATOM | 1922 | NE   | ARG | 123 | -6.245  | 8.167  | -20.111 |
| ATOM | 1923 | HE   | ARG | 123 | -5.995  | 9.135  | -20.272 |
| ATOM | 1924 | CZ   | ARG | 123 | -5.258  | 7.373  | -19.617 |
| ATOM | 1925 | NH1  | ARG | 123 | -5.282  | 6.039  | -19.451 |
| ATOM | 1926 | HH11 | ARG | 123 | -5.980  | 5.478  | -19.838 |
| ATOM | 1927 | HH12 | ARG | 123 | -4.432  | 5.588  | -19.158 |
| ATOM | 1928 | NH2  | ARG | 123 | -4.155  | 8.022  | -19.392 |
| ATOM | 1929 | HH21 | ARG | 123 | -4.177  | 8.991  | -19.684 |
| ATOM | 1930 | HH22 | ARG | 123 | -3.361  | 7.642  | -18.854 |
| ATOM | 1931 | C    | ARG | 123 | -11.960 | 6.908  | -21.095 |
| ATOM | 1932 | O    | ARG | 123 | -13.049 | 6.966  | -20.469 |
| ATOM | 3532 | N    | ARG | 225 | -1.335  | 10.708 | -10.304 |
| ATOM | 3533 | HN   | ARG | 225 | -0.548  | 10.485 | -9.760  |
| ATOM | 3534 | CA   | ARG | 225 | -2.529  | 9.811  | -10.122 |
| ATOM | 3535 | HA   | ARG | 225 | -3.342  | 10.215 | -10.680 |
| ATOM | 3536 | CB   | ARG | 225 | -2.135  | 8.346  | -10.588 |
| ATOM | 3537 | HB1  | ARG | 225 | -2.787  | 7.573  | -10.132 |
| ATOM | 3538 | HB2  | ARG | 225 | -1.038  | 8.185  | -10.355 |
| ATOM | 3539 | CG   | ARG | 225 | -2.264  | 8.203  | -12.116 |
| ATOM | 3540 | HG1  | ARG | 225 | -3.238  | 8.558  | -12.492 |

|      |      |      |     |     |        |        |         |
|------|------|------|-----|-----|--------|--------|---------|
| ATOM | 3541 | HG2  | ARG | 225 | -2.251 | 7.139  | -12.366 |
| ATOM | 3542 | CD   | ARG | 225 | -1.328 | 8.857  | -13.081 |
| ATOM | 3543 | HD1  | ARG | 225 | -0.217 | 8.671  | -12.832 |
| ATOM | 3544 | HD2  | ARG | 225 | -1.452 | 10.007 | -13.046 |
| ATOM | 3545 | NE   | ARG | 225 | -1.611 | 8.471  | -14.509 |
| ATOM | 3546 | HE   | ARG | 225 | -2.183 | 7.631  | -14.779 |
| ATOM | 3547 | CZ   | ARG | 225 | -0.983 | 9.110  | -15.496 |
| ATOM | 3548 | NH1  | ARG | 225 | -0.253 | 10.209 | -15.357 |
| ATOM | 3549 | HH11 | ARG | 225 | -0.104 | 10.607 | -14.481 |
| ATOM | 3550 | HH12 | ARG | 225 | 0.252  | 10.651 | -16.107 |
| ATOM | 3551 | NH2  | ARG | 225 | -1.248 | 8.712  | -16.738 |
| ATOM | 3552 | HH21 | ARG | 225 | -1.835 | 7.970  | -16.917 |
| ATOM | 3553 | HH22 | ARG | 225 | -1.013 | 9.202  | -17.570 |
| ATOM | 3554 | C    | ARG | 225 | -2.912 | 9.846  | -8.653  |
| ATOM | 3555 | O    | ARG | 225 | -2.062 | 9.912  | -7.747  |
| ATOM | 5870 | C6   | HMI | 373 | -5.766 | 0.543  | -15.086 |
| ATOM | 5871 | O61  | HMI | 373 | -6.161 | 0.406  | -16.274 |
| ATOM | 5872 | O62  | HMI | 373 | -5.911 | -0.307 | -14.166 |
| ATOM | 5873 | H1   | HMI | 373 | -5.548 | 2.412  | -14.018 |
| ATOM | 5874 | C5   | HMI | 373 | -5.007 | 1.820  | -14.761 |
| ATOM | 5875 | H2   | HMI | 373 | -4.329 | 2.081  | -16.851 |
| ATOM | 5876 | C4   | HMI | 373 | -4.644 | 2.615  | -15.958 |
| ATOM | 5877 | H3   | HMI | 373 | -4.797 | 4.528  | -15.059 |
| ATOM | 5878 | C3   | HMI | 373 | -4.547 | 3.953  | -15.939 |
| ATOM | 5879 | O51  | HMI | 373 | -3.628 | 4.192  | -18.127 |
| ATOM | 5880 | C2   | HMI | 373 | -3.850 | 4.643  | -16.998 |
| ATOM | 5881 | C6   | HMI | 373 | -3.262 | 6.016  | -16.611 |
| ATOM | 5882 | O11  | HMI | 373 | -2.724 | 6.670  | -17.549 |
| ATOM | 5883 | O12  | HMI | 373 | -3.329 | 6.354  | -15.410 |

Complete reference for Ref. 51.

(51) Gaussian 09, Revision A.1, M. J. Frisch, G. W. Trucks, H. B. Schlegel, G. E. Scuseria, M. A. Robb, J. R. Cheeseman, G. Scalmani, V. Barone, B. Mennucci, G. A. Petersson, H. Nakatsuji, M. Caricato, X. Li, H. P. Hratchian, A. F. Izmaylov, J. Bloino, G. Zheng, J. L. Sonnenberg, M. Hada, M. Ehara, K. Toyota, R. Fukuda, J. Hasegawa, M. Ishida, T. Nakajima, Y. Honda, O. Kitao, H. Nakai, T. Vreven, J. A. Montgomery, Jr., J. E. Peralta, F. Ogliaro, M. Bearpark, J. J. Heyd, E. Brothers, K. N. Kudin, V. N. Staroverov, R. Kobayashi, J. Normand, K. Raghavachari, A. Rendell, J. C. Burant, S. S. Iyengar, J. Tomasi, M. Cossi, N. Rega, J. M. Millam, M. Klene, J. E. Knox, J. B. Cross, V. Bakken, C. Adamo, J. Jaramillo, R. Gomperts, R. E. Stratmann, O. Yazyev, A. J. Austin, R. Cammi, C. Pomelli, J. W. Ochterski, R. L. Martin, K. Morokuma, V. G. Zakrzewski, G. A. Voth, P. Salvador, J. J. Dannenberg, S. Dapprich, A. D. Daniels, Ö. Farkas, J. B. Foresman, J. V. Ortiz, J. Cioslowski, and D. J. Fox, Gaussian, Inc., Wallingford CT, 2009.
